# Supplementary material for: Bioinformatic profiling of prognosis-related genes in the breast cancer immune microenvironment
Source: publisher site journal article supplement (doi:10.18632/aging.102373), 2019-11-12
Supplement: Supplementary file [file aging-v11i21-102373-supplementary-material-SD1.pdf]

SUPPLEMENTARY FIGURES

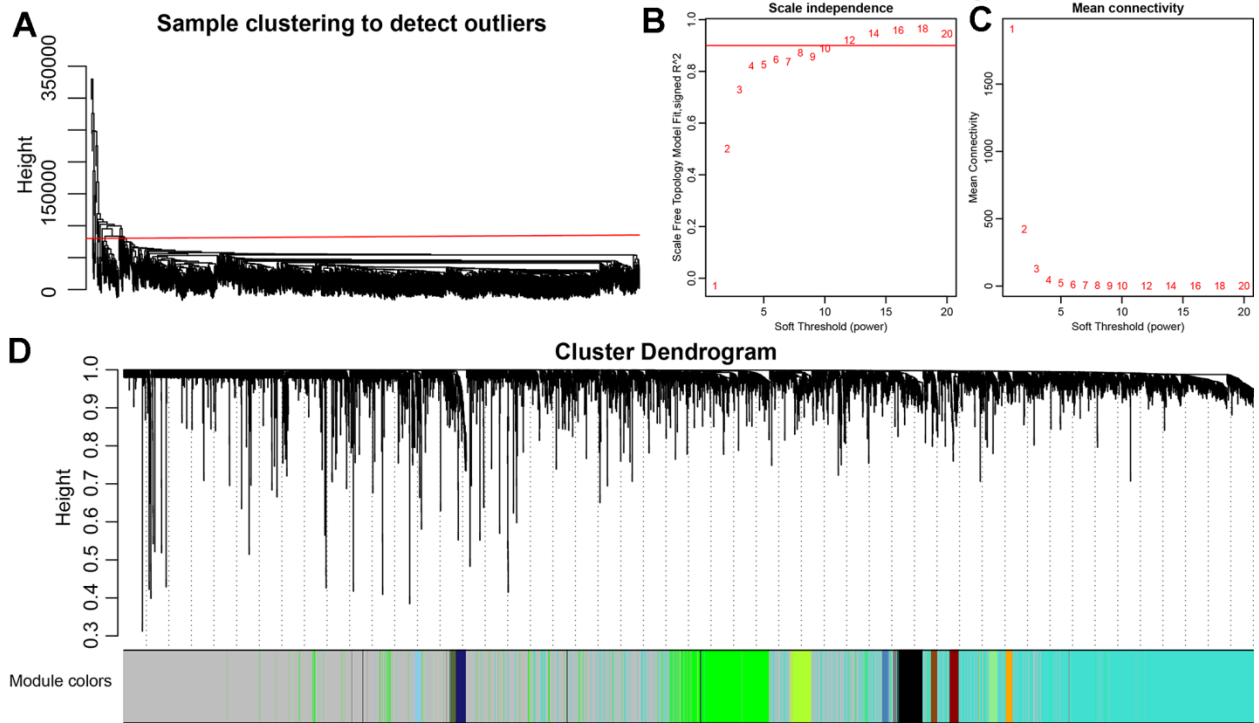

Supplementary Figure 1. LCK metagenes-related gene modules mined through WGCNA. (A) Sample clustering analysis. (B, C) Analysis of network topology under various soft-thresholding powers. (D) Gene dendrogram and module colors.

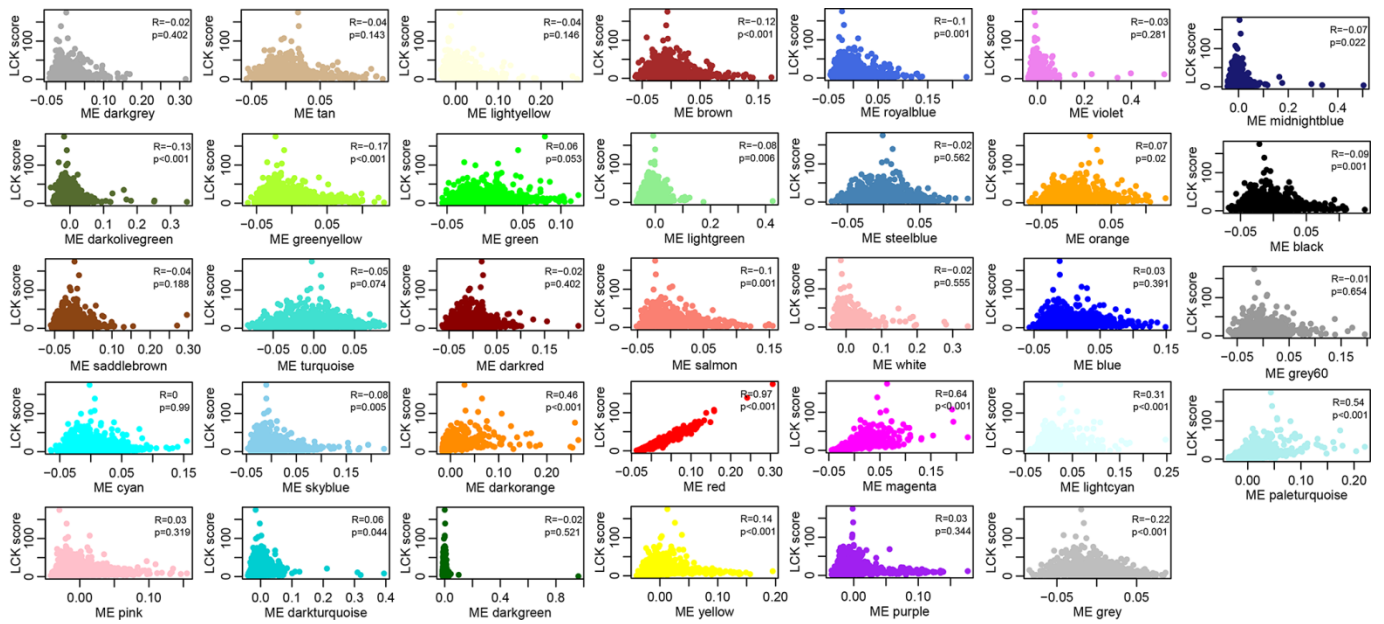

Supplementary Figure 2. Correlation between eigenvectors of 34 gene modules and LCK metagenes.

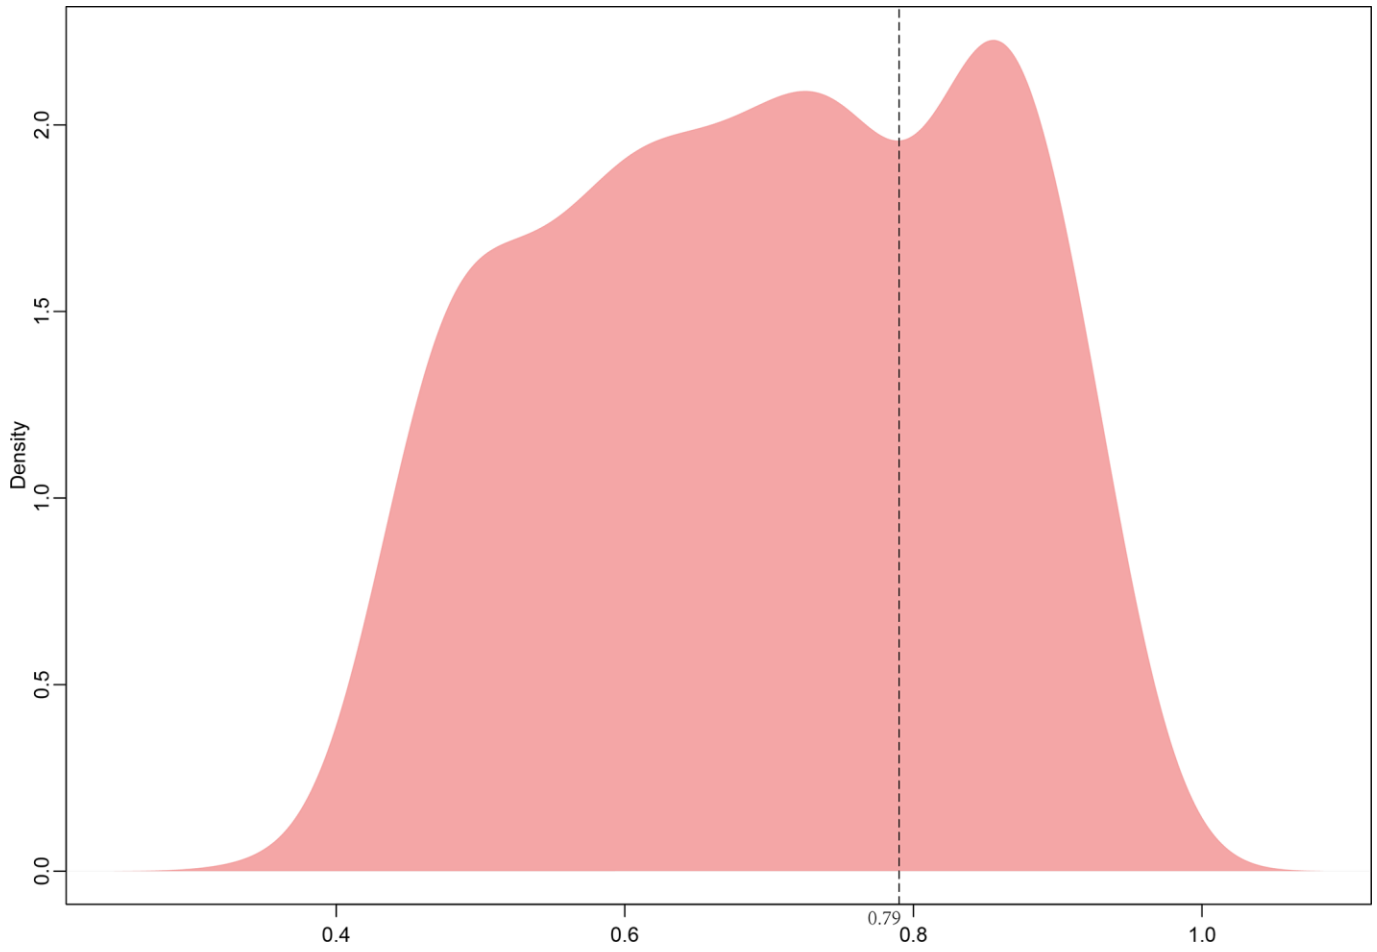

**Supplementary Figure 3. Screening of module-related genes.**

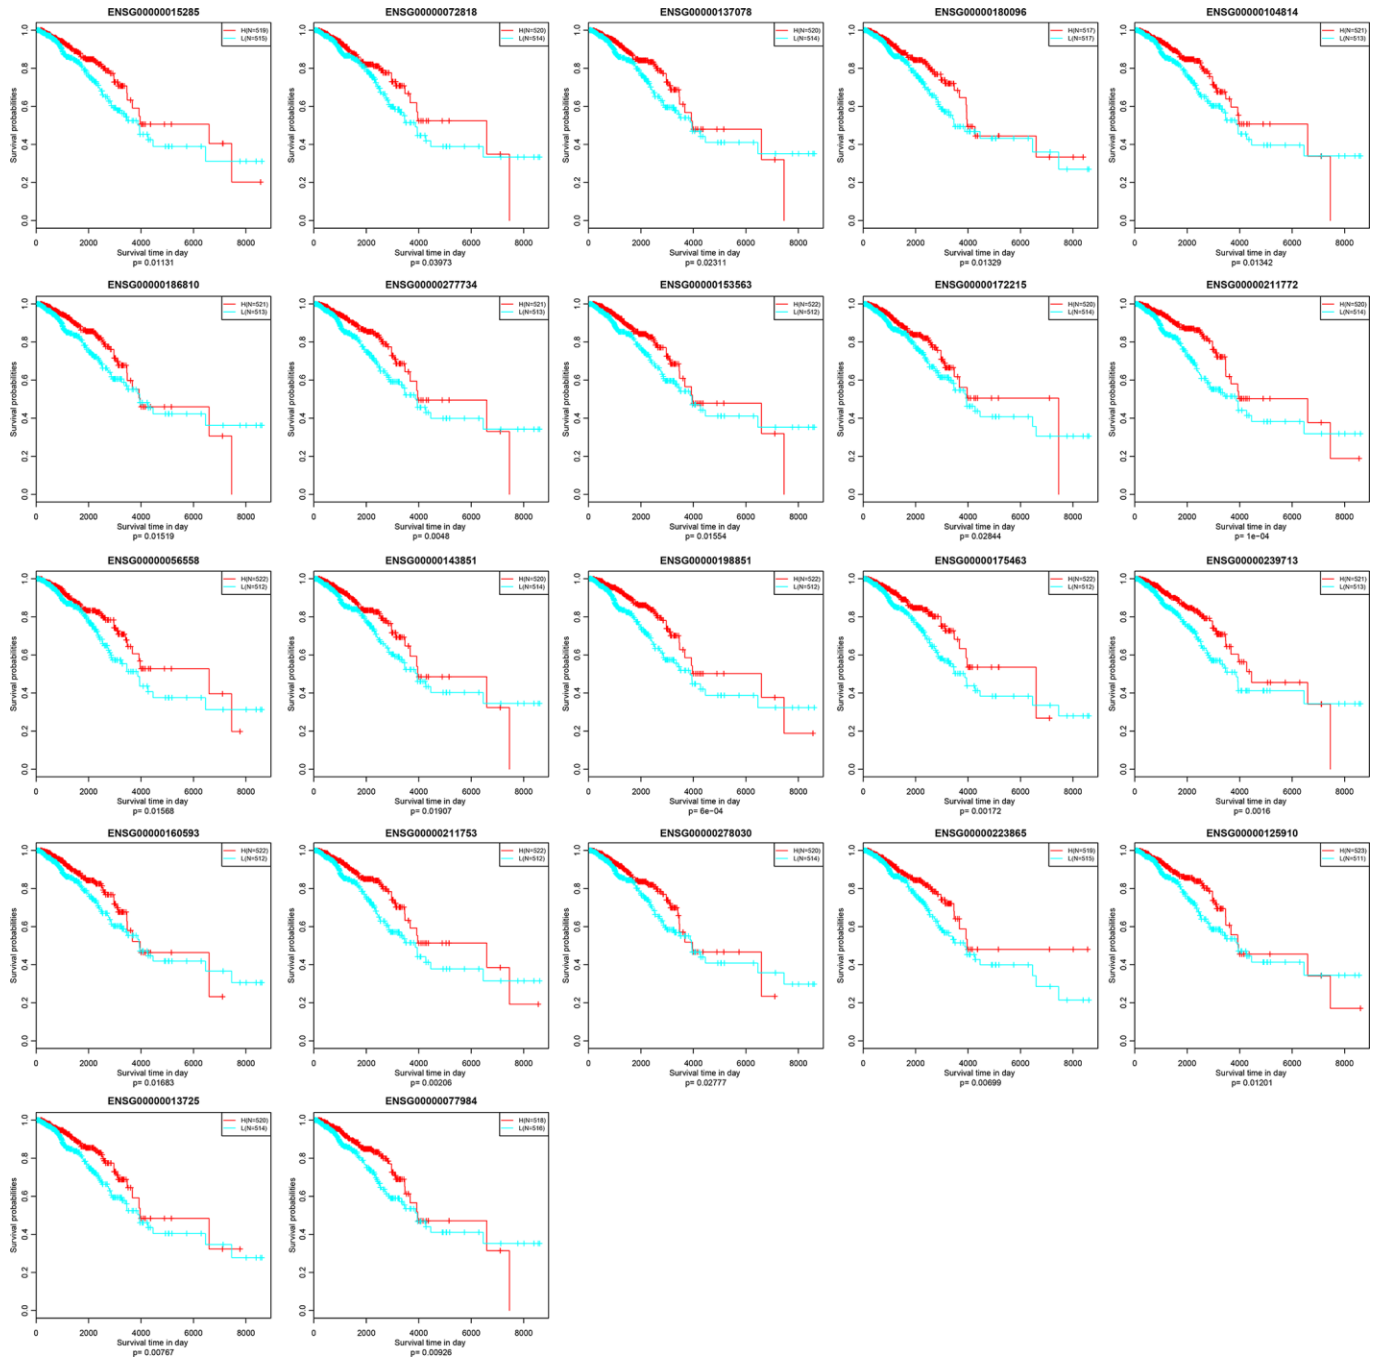

**Supplementary Figure 4. Relationship between 22 immune microenvironment-related genes and prognosis.** Kaplan-Meier survival curve between high expression and Low expression group of breast cancer patients.

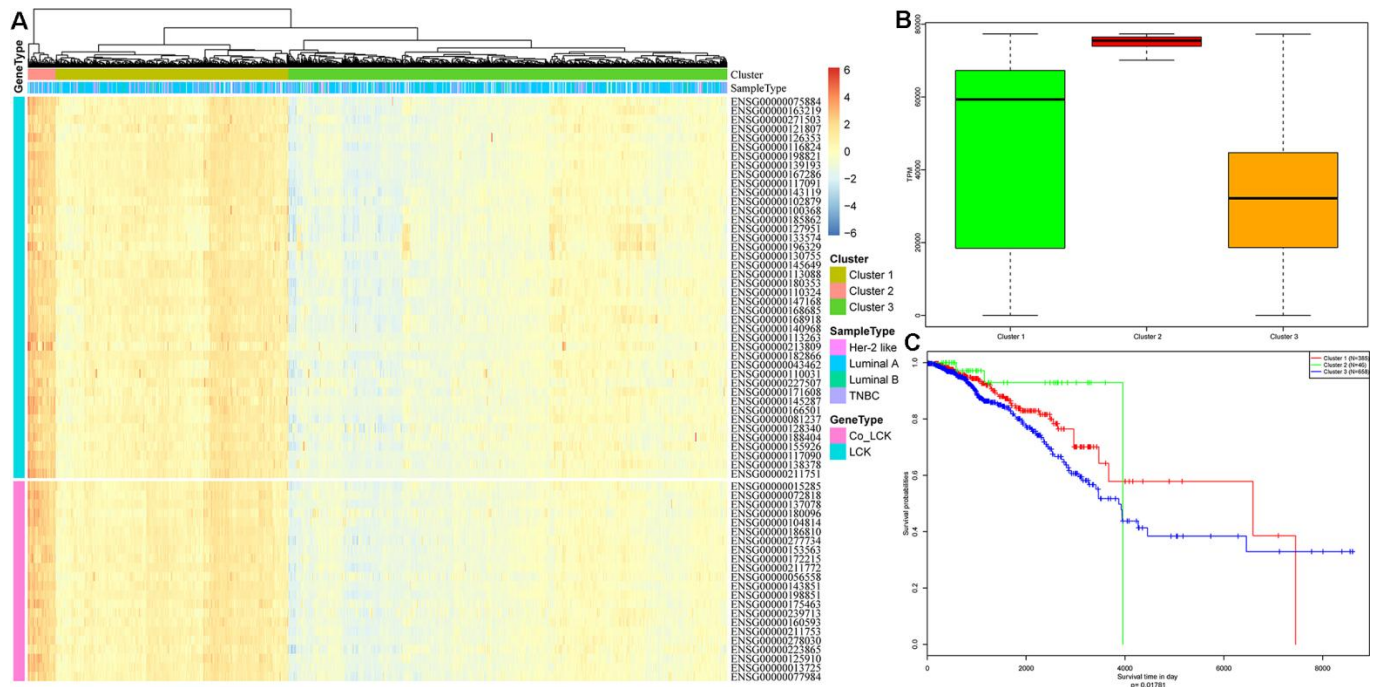

**Supplementary Figure 5. Correlations of 22 immune microenvironment-related prognostic genes and LCK metagenes.** (A) Expression profiles of 22 immune microenvironment-related prognostic genes and 42 gene members in LCK metagenes. (B) LCK metagenes scores in the three clusters. (C) Kaplan-Meier survival curves for the three clusters.

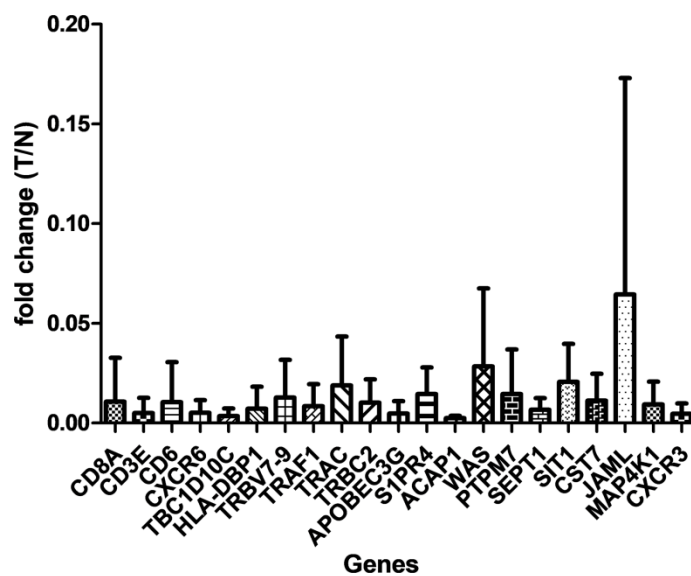

**Supplementary Figure 6. Fold change of 22 genes.** Data are represented as mean +/- SD.
