# Supplementary material for: Bioinformatic profiling of prognosis-related genes in the breast cancer immune microenvironment
Source: publisher site journal article supplement (doi:10.18632/aging.102373), 2019-11-12
Supplement: Supplementary file [file aging-v11i21-102373-supplementary-material-SD2.pdf]

## SUPPLEMENTARY TABLE

**Supplementary Table 1. The number of genes corresponding to each module.**

| <b>Module</b>  | <b>Number</b> |
|----------------|---------------|
| black          | 174           |
| blue           | 848           |
| brown          | 755           |
| cyan           | 106           |
| darkgreen      | 54            |
| darkgrey       | 47            |
| darkolivegreen | 32            |
| darkorange     | 43            |
| darkred        | 56            |
| darkturquoise  | 51            |
| green          | 674           |
| greenyellow    | 138           |
| grey           | 7437          |
| grey60         | 63            |
| lightcyan      | 64            |
| lightgreen     | 62            |
| lightyellow    | 60            |
| magenta        | 155           |
| midnightblue   | 66            |
| orange         | 45            |
| paleturquoise  | 39            |
| pink           | 169           |
| purple         | 139           |
| red            | 355           |
| royalblue      | 59            |
| saddlebrown    | 41            |
| salmon         | 127           |
| skyblue        | 41            |
| steelblue      | 41            |
| tan            | 127           |
| turquoise      | 2076          |
| violet         | 37            |
| white          | 42            |
| yellow         | 744           |
